# Supplementary material for: Early response evaluation by single cell signaling profiling in acute myeloid leukemia
Source: Nat Commun. 2023 Jan 7;14:115. doi: 10.1038/s41467-022-35624-4 (PMC9825407; doi:10.1038/s41467-022-35624-4)
Supplement: Supplementary file 7 — Supplementary data 4 [file 41467_2022_35624_MOESM7_ESM.xlsx]

## Sheet: Sheet1
Gene	Cluster
ABHD5	DEG
ARL5B	DEG
ARRDC4	DEG
BHLHE40	DEG
C2ORF42	DEG
C6ORF141	DEG
CA2	DEG
CDKN1A	DEG
COQ10B	DEG
DDX21	DEG
EFNB2	DEG
ERRFI1	DEG
FAM57A	DEG
FAM83G	DEG
GADD45A	DEG
GADD45B	DEG
GEM	DEG
GPR50	DEG
GTF2B	DEG
HBEGF	DEG
HOMER1	DEG
ID4	DEG
KDM6B	DEG
KIAA0020	DEG
KLF10	DEG
KRT8	DEG
MAK16	DEG
MXD1	DEG
NDRG1	DEG
NIPAL1	DEG
NRARP	DEG
PDK4	DEG
PLAT	DEG
PMAIP1	DEG
PMM2	DEG
PPP1R15A	DEG
PSMD12	DEG
RND3	DEG
SBDS	DEG
SDC4	DEG
SERPINB9	DEG
SLC2A1	DEG
SPRY2	DEG
TFB2M	DEG
TFPI2	DEG
TNFAIP3	DEG
TNFRSF12A	DEG
TXNL4B	DEG
UBALD2	DEG
UTP3	DEG
ZCCHC12	DEG
ZFP36	DEG
ZNF26	DEG
ZSWIM6	DEG
BTG2	IEG
CYR61	IEG
DNAJB1	IEG
DUSP1	IEG
EGR1	IEG
EGR2	IEG
EGR3	IEG
ETV5	IEG
FOS	IEG
FOSB	IEG
IER2	IEG
IER3	IEG
INSIG1	IEG
JUNB	IEG
NAGK	IEG
NPTX2	IEG
RBM14	IEG
RNF122	IEG
TIMP3	IEG
TRIB1	IEG
YRDC	IEG
AKIRIN2	ILG
ARC	ILG
BAIAP2	ILG
BCL10	ILG
CLU	ILG
CMC2	ILG
CSRNP1	ILG
CTGF	ILG
DUSP6	ILG
EGR4	ILG
F2RL1	ILG
FOSL1	ILG
FOSL2	ILG
GPR3	ILG
LY6K	ILG
MCL1	ILG
MFSD2A	ILG
MIDN	ILG
NPPC	ILG
NR4A1	ILG
NXF1	ILG
PNP	ILG
PTGS2	ILG
QSOX1	ILG
SPRY4	ILG
SYAP1	ILG
ZYX	ILG
ABCB1	SRG
AGPAT5	SRG
ARID3B	SRG
BZW1	SRG
CA8	SRG
CACNA2D1	SRG
CCNE2	SRG
CD44	SRG
CD55	SRG
CDK7	SRG
CHAC1	SRG
CHRM4	SRG
CHST15	SRG
CLDND1	SRG
CPEB2	SRG
CRABP2	SRG
CYB5R2	SRG
DNAJA1	SRG
DRAP1	SRG
ELF4	SRG
EMP1	SRG
EN2	SRG
ENC1	SRG
EPHA2	SRG
ERCC1	SRG
FAM3C	SRG
FBXO32	SRG
GBE1	SRG
GCH1	SRG
GNL2	SRG
GPR137B	SRG
GPR75	SRG
HIPK2	SRG
HK2	SRG
HMGCS1	SRG
IFRD1	SRG
INPP1	SRG
KCTD13	SRG
LONRF3	SRG
LRRC8B	SRG
LY6G5B	SRG
NAB2	SRG
NPAS2	SRG
NPTX1	SRG
OTUD4	SRG
PBDC1	SRG
PEA15	SRG
PGBD5	SRG
PHLDA2	SRG
PNPLA8	SRG
PRKCD	SRG
PRNP	SRG
PXDC1	SRG
PYGO1	SRG
RAI2	SRG
RIOK1	SRG
RNF19A	SRG
RNF24	SRG
ROMO1	SRG
RPS24	SRG
SERPINB8	SRG
SERPINE2	SRG
SERTAD1	SRG
SGMS2	SRG
SLC30A7	SRG
SLC35G2	SRG
SLC7A1	SRG
SLC7A5	SRG
SPOPL	SRG
SPSB1	SRG
SRXN1	SRG
STX11	SRG
TAF13	SRG
TCF7	SRG
TGFB1	SRG
THBS1	SRG
TMEM2	SRG
TMEM88	SRG
TNC	SRG
TNFRSF10D	SRG
TOR1B	SRG
TRIB3	SRG
TRIM9	SRG
UAP1	SRG
UBXN8	SRG
UPP1	SRG
VGF	SRG
1110008E08RIK	pp38
1110020G09RIK	pp38
1110028C15RIK	pp38
1200011M11RIK	pp38
1500001A10RIK	pp38
1700025G04RIK	pp38
1700029F09RIK	pp38
1700057K13RIK	pp38
1810019J16RIK	pp38
1810065E05RIK	pp38
2010111I01RIK	pp38
2010300C02RIK	pp38
2410002O22RIK	pp38
2610024G14RIK	pp38
2700046A07RIK	pp38
3110039M20RIK/FOXG1	pp38
3222401L13RIK	pp38
3222401L13RIK	pp38
4632415K11RIK	pp38
4930451C15RIK	pp38
4930505N22RIK	pp38
4930505N22RIK	pp38
4930510E17RIK	pp38
4930547C10RIK	pp38
4933403O08RIK	pp38
4933414I15RIK	pp38
4933436I01RIK	pp38
5530401A14RIK	pp38
6030445D17RIK	pp38
6030445D17RIK	pp38
6330416G13RIK	pp38
6330512M04RIK	pp38
8430408G22RIK	pp38
9130008F23RIK	pp38
A330084C13RIK	pp38
A630033H20RIK	pp38
A730017C20RIK	pp38
A930038C07RIK	pp38
A930104D05RIK	pp38
ABCD2	pp38
ABPD	pp38
ABT1	pp38
ABTB2	pp38
AC073590.5-4	pp38
AC073590.5-4	pp38
AC122918.4-4	pp38
AC125228.4-6	pp38
ACCN2	pp38
ACCN3	pp38
ADAM12	pp38
ADAMTS1	pp38
ADCY1	pp38
AFAP1L1	pp38
AI118078	pp38
AI504432	pp38
ALOX12B	pp38
AMD1	pp38
AMPD3	pp38
ANGEL1	pp38
ANK	pp38
APBB2	pp38
ARRDC3	pp38
ART3	pp38
ART3	pp38
ASPN	pp38
ATF3	pp38
ATF6	pp38
ATP1B3	pp38
AU018778	pp38
AU040829	pp38
AXIN2	pp38
B3GNT5	pp38
B3GNT5	pp38
BARHL2	pp38
BC049730	pp38
BC049730	pp38
BC049807	pp38
BC051019	pp38
BC067068	pp38
BCL11A	pp38
BDNF	pp38
BHLHE40	pp38
BTG1	pp38
C330023M02RIK	pp38
C77080	pp38
CACNA1E	pp38
CAV1	pp38
CCDC42	pp38
CCL2	pp38
CCL20	pp38
CCL22	pp38
CCL4	pp38
CCL7	pp38
CCNL1	pp38
CCRN4L	pp38
CD24A	pp38
CD2AP	pp38
CD59B	pp38
CDC2L5	pp38
CDC42EP3	pp38
CDH17	pp38
CFP	pp38
CHKA	pp38
CHRM3	pp38
CITED2	pp38
CNTN3	pp38
CNTN6	pp38
COQ10B	pp38
CPNE8	pp38
CRY1	pp38
CSF1	pp38
CTGF	pp38
CTHRC1	pp38
CXCL1	pp38
CXCL10	pp38
CXCL2	pp38
CXCL3	pp38
CXCL5	pp38
CXCL9	pp38
CYP1B1	pp38
CYP26A1	pp38
CYP51	pp38
CYR61	pp38
D030056L22RIK	pp38
D4WSU53E	pp38
DACH1	pp38
DCAF12L2	pp38
DCUN1D4	pp38
DCX	pp38
DDIT3	pp38
DDIT4L	pp38
DDX4	pp38
DDX5	pp38
DHRS9	pp38
DHX15	pp38
DHX33	pp38
DHX9	pp38
DLX2	pp38
DNAHC7L	pp38
DNAHC9	pp38
DNAJA2	pp38
DNAJB4	pp38
DNAJB4	pp38
DNAJB9	pp38
DPH2	pp38
DPP4	pp38
DSG1B	pp38
DSP	pp38
DUSP10	pp38
DYRK1A	pp38
E330009J07RIK	pp38
EAF1	pp38
ECT2	pp38
EDN1	pp38
EEF1A1	pp38
EGFR	pp38
ELF1	pp38
EPS8	pp38
ETS1	pp38
EXTL3	pp38
F2R	pp38
F3	pp38
FAM171A2	pp38
FAM188A	pp38
FAM19A2	pp38
FAM43A	pp38
FBXO28	pp38
FBXO43	pp38
FEM1B	pp38
FFAR2	pp38
FGF13	pp38
FHL4	pp38
FILIP1L	pp38
FLI1	pp38
FLRT3	pp38
FNIP1	pp38
FOXA2	pp38
FOXC1	pp38
FOXD1	pp38
FOXF2	pp38
FPR-RS7	pp38
FSTL5	pp38
GABPB1	pp38
GABRB3	pp38
GALNT7	pp38
GALR1	pp38
GAPT	pp38
GATA6	pp38
GATAD2A	pp38
GBE1	pp38
GCLC	pp38
GCNT3	pp38
GDF10	pp38
GDPD4	pp38
GJB3	pp38
GKN2	pp38
GLCCI1	pp38
GLP2R	pp38
GM10634	pp38
GM10878	pp38
GM11117	pp38
GM12657	pp38
GM129	pp38
GM13363	pp38
GM15430	pp38
GM16387	pp38
GM16462	pp38
GM16462	pp38
GM5111	pp38
GM6083	pp38
GM6377	pp38
GM6377	pp38
GM6910	pp38
GM7334	pp38
GNG12	pp38
GNGT2	pp38
GRIP1	pp38
GSC	pp38
GSPT1	pp38
H13	pp38
H1FOO	pp38
H2-K1	pp38
H2-OB	pp38
H2-Q10	pp38
H2AFZ	pp38
HCCS	pp38
HERPUD2	pp38
HIF1A	pp38
HIST1H1C	pp38
HIST1H1T	pp38
HIST1H4I	pp38
HIST3H2A	pp38
HNRNPA1	pp38
HOXC12	pp38
HS3ST1	pp38
HS3ST3A1	pp38
HSP90AA1	pp38
HSPH1	pp38
HYAL4	pp38
ID1	pp38
ID2	pp38
IER5L	pp38
IL1RAP	pp38
IL22RA2	pp38
INHBA	pp38
IRF1	pp38
ITGB1BP3	pp38
JUN	pp38
JUND	pp38
KBTBD3	pp38
KCNQ2	pp38
KCNV2	pp38
KCTD12B	pp38
KHDC1A	pp38
KHDC1C	pp38
KIF21A	pp38
KLF10	pp38
KLF11	pp38
KLF2	pp38
KLF4	pp38
KLF6	pp38
KLF9	pp38
KRT23	pp38
LARP2	pp38
LCN13	pp38
LEMD3	pp38
LHX5	pp38
LHX9	pp38
LIG4	pp38
LRRC67	pp38
LYAR	pp38
MAFF	pp38
MAFK	pp38
MAL	pp38
MAP3K8	pp38
MAS1	pp38
MBNL1	pp38
MBTD1	pp38
MECOM	pp38
MILL1	pp38
MPHOSPH10	pp38
MT-ATP6	pp38
MT-CO2	pp38
MT-ND4	pp38
MT-ND5	pp38
MT2	pp38
MUC19	pp38
MUM1L1	pp38
MYC	pp38
MYCN	pp38
MYH14	pp38
MYO9A	pp38
NAIP1	pp38
NFATC1	pp38
NFIL3	pp38
NFKBIZ	pp38
NINL	pp38
NIP7	pp38
NKX2-9	pp38
NOP10	pp38
NOP2	pp38
NOP58	pp38
NPM1	pp38
NR2F2	pp38
NT5DC3	pp38
OAS1H	pp38
OBFC2A	pp38
ODAM	pp38
OLFR1015	pp38
OLFR1057	pp38
OLFR1136	pp38
OLFR1228	pp38
OLFR1294	pp38
OLFR138	pp38
OLFR1484	pp38
OLFR1540-PS1/OLFR193	pp38
OLFR284	pp38
OLFR392	pp38
OLFR470	pp38
OLFR473	pp38
OLFR585	pp38
OLFR670	pp38
OLFR677	pp38
OLFR702	pp38
OLFR746	pp38
OLFR746	pp38
OLFR806	pp38
OLFR816	pp38
OLFR905	pp38
OLFR943	pp38
OLFR960	pp38
OLIG1	pp38
OLR1	pp38
OPN1MW	pp38
OSBPL6	pp38
OTX2	pp38
P2RY1	pp38
PATL1	pp38
PAX1	pp38
PBX3	pp38
PCDH11X	pp38
PCF11	pp38
PCSK1N	pp38
PDE6A	pp38
PDILT	pp38
PENK	pp38
PGAM1	pp38
PGC	pp38
PHF15	pp38
PHLDA1	pp38
PITPNC1	pp38
PITPNM1	pp38
PLAUR	pp38
PLCZ1	pp38
PLK2	pp38
PLK3	pp38
PLXDC2	pp38
PMAIP1	pp38
PNO1	pp38
POF1B	pp38
POU3F3	pp38
PPAT	pp38
PPM1D	pp38
PPP2R5A	pp38
PRCP	pp38
PRL2C3/PRL2C4	pp38
PRR9	pp38
PSEN2	pp38
PTH2R	pp38
PTMA	pp38
PTP4A1	pp38
PTP4A2	pp38
PTPLA	pp38
PTPRD	pp38
PTX3	pp38
PWP2	pp38
RAB32	pp38
RASD1	pp38
RBM15	pp38
RBPJ	pp38
RFTN2	pp38
RG9MTD1	pp38
RG9MTD2	pp38
RHBDF2	pp38
RIC3	pp38
RIPK2	pp38
RLBP1L2	pp38
RNF128	pp38
RNF24	pp38
ROCK1	pp38
RRBP1	pp38
RRS1	pp38
RTN4R	pp38
RUNX2	pp38
S100A11	pp38
S100A7A	pp38
SAP30	pp38
SC4MOL	pp38
SCFD2	pp38
SCRT1	pp38
SDCBP	pp38
SDR16C5	pp38
SELE	pp38
SEPHS1	pp38
SERPINB13	pp38
SERPINE1	pp38
SFRP2	pp38
SGK1	pp38
SHC3	pp38
SIK1	pp38
SIKE1	pp38
SIPA1L2	pp38
SIRT1	pp38
SIRT7	pp38
SLC15A1	pp38
SLC20A1	pp38
SLC22A3	pp38
SLC25A25	pp38
SLC30A3	pp38
SLC35F1	pp38
SLC40A1	pp38
SLC4A11	pp38
SLC5A1	pp38
SLC6A5	pp38
SLC7A15	pp38
SLCO1A1	pp38
SLFN1	pp38
SMAD7	pp38
SNAPC1	pp38
SORBS2	pp38
SOX11	pp38
SOX2	pp38
SOX9	pp38
SPOCK3	pp38
SPP1	pp38
SPR	pp38
SPRY4	pp38
ST3GAL6	pp38
STK31	pp38
STK4	pp38
STXBP5L	pp38
STYK1	pp38
TAS2R110	pp38
TBATA	pp38
TBC1D15	pp38
TBC1D23	pp38
TCTEX1D1	pp38
TEX12	pp38
TEX18	pp38
TFDP2	pp38
TGIF1	pp38
TINAGL1	pp38
TLN2	pp38
TM4SF20	pp38
TMED5	pp38
TMOD2	pp38
TMPRSS11E	pp38
TNFAIP2	pp38
TOB1	pp38
TOPORS	pp38
TPH2	pp38
TPT1	pp38
TRIM47	pp38
TRMT6	pp38
TRP63	pp38
TRPD52L3	pp38
TRPM3	pp38
TSLP	pp38
TSR1	pp38
TTC23L	pp38
TTLL7	pp38
TTN	pp38
TWIST2	pp38
TXK	pp38
UCHL3	pp38
UMODL1	pp38
UTP18	pp38
V1RC15	pp38
V1RC24	pp38
V1RG5	pp38
V1RG8	pp38
V1RH17	pp38
VCAM1	pp38
VCL	pp38
VEGFA	pp38
VIM	pp38
VPS13B	pp38
YOD1	pp38
YPEL5	pp38
ZBTB10	pp38
ZBTB43	pp38
ZEB2	pp38
ZFP106	pp38
ZFP13	pp38
ZFP236	pp38
ZFP367	pp38
ZFP36L1	pp38
ZFP655	pp38
ZFP708	pp38
ZFP800	pp38
